# Supplementary material for: A Novel Reduplicate Strategy for Tracing Hemostatic Compounds from Heating Products of the Flavonoid Extract in Platycladi cacumen by Spectrum-Effect Relationships and Column Chromatography
Source: Molecules. 2015 Sep 17;20(9):16970–86. doi: 10.3390/molecules200916970 (PMC6332512; doi:10.3390/molecules200916970)
Supplement: Supplementary file 1 [file molecules-20-16970-s001.pdf]

# Supplementary Materials

**Table S1.** Mark compounds contents in the flavonoid extract in Platycladi Cacumen (FPC).

| Samples | Content (% , <i>n</i> = 3) |                                    |            |               |
|---------|----------------------------|------------------------------------|------------|---------------|
|         | Myricetrin                 | Kaempferol-3- <i>O</i> -rhamnoside | Quercitrin | Amentoflavone |
| FPC     | 20.22                      | 10.45                              | 44.74      | 14.41         |

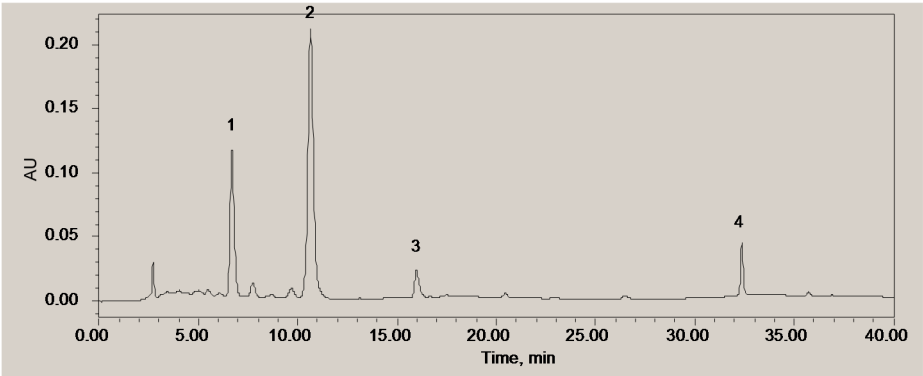

**Figure S1.** HPLC chromatogram of sample FPC. Four peaks were identified by comparing with the standard substance: myticetrin (1), quercetrin (2), kaempferol-3-*O*-rhamnoside (3), amentoflacone (4).

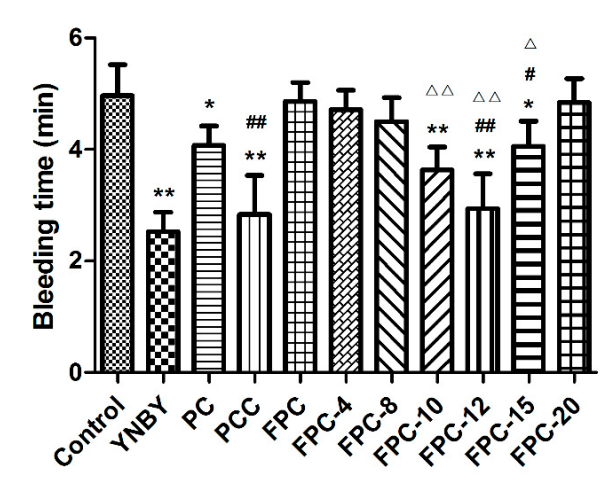

**Figure S2.** Effect of PC, PCC and FPC-N on haemostasis in rat was analysed by measuring the bleeding time after removal of 2 mm of tail tip. Data are represented as mean  $\pm$  SD of 8 animals. The significance between control and treated groups, PC group and the other treated groups, FPC group and the other FPC-N groups, and the *p* values were calculated by one-way analysis of variance. As compared to control group, \*\* *p* < 0.01, \* *p* < 0.05; as compared to PC group, ## *p* < 0.01, # *p* < 0.05; as compared to FPC group,  $\Delta\Delta$  *p* < 0.01,  $\Delta$  *p* < 0.05.
